# Supplementary material for: Frazzled/Dcc acts independently of Netrin to promote germline survival during Drosophila oogenesis
Source: Oxford University Press journal article supplement (doi:10.1242/dev.199762), 2021-12-15
Supplement: dev199762supp.pdf [file dev199762supp.pdf]

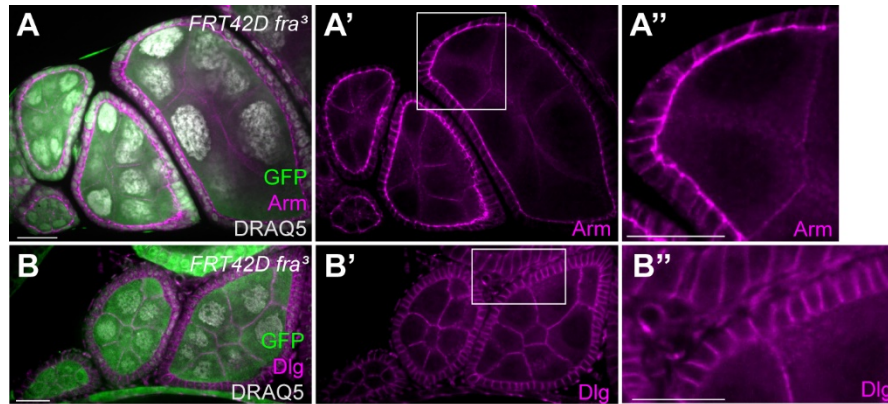

**Fig. S1. Armadillo and Discs large do not appear to be affected by loss of *fra* from the germline or follicle cells.** (A) Egg chambers that have wild-type germline cysts (GFP+) and some *fra* mutant follicle cells (GFP-) stained for GFP (green), Arm (magenta), and DRAQ5 (grey). (A') Arm channel from A. (A'') inset from A' with both GFP+ and GFP- follicle cells. (B) Egg chambers with wild-type cysts (GFP+) and *fra* mutant follicle cells (GFP-) stained for GFP (green), Discs large (magenta), and DRAQ5 (grey). (B') Discs large channel from B. (B'') inset from B' with both GFP+ and GFP- follicle cells. Scale bars are 20 microns.

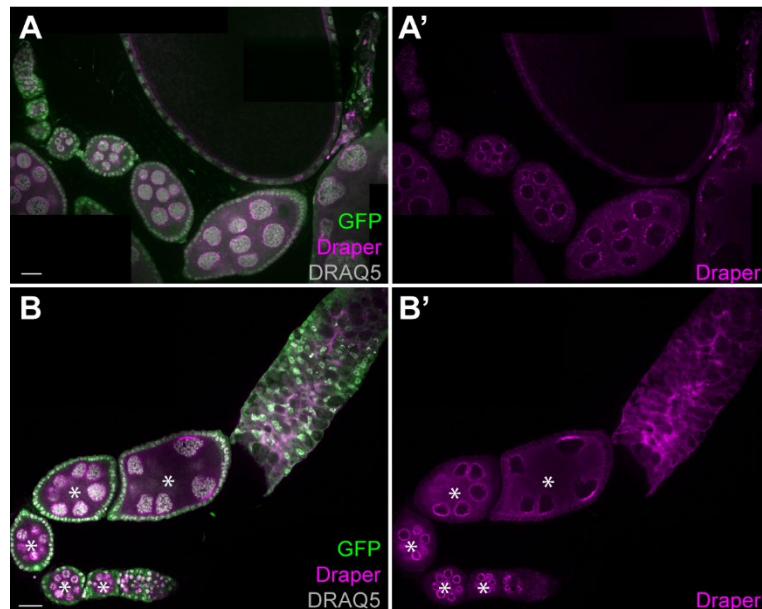

**Fig. S2. Draper is expressed in dying egg chambers.** (A) Wild type ovariole with a degenerating egg chamber stained for GFP (green), Draper (magenta), and DRAQ5 (grey). (B') Draper channel from A. (B) Ovariole with *fra* mutant germline cysts (GFP-, white asterisks) stained for GFP (green), Draper (magenta), and DRAQ5 (grey). (B') Draper channel from B. Scale bars are 20 microns.

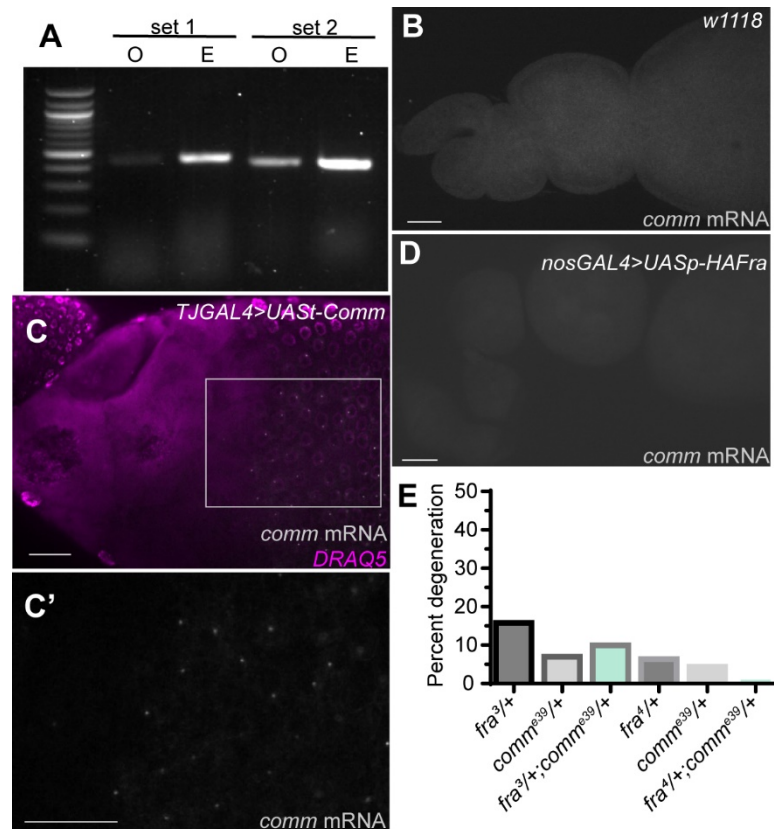

**Fig. S3. Comm does not appear to be expressed in the germline.** (A) RT-PCR for *comm* using two different primer sets on ovary (O) and embryonic (E) samples. (B) Optical section through the middle of a wild type ovariole. Small molecule fluorescent in situ hybridization (smFISH) for *comm* mRNA (grey), over-exposed. (C) Ovariole with Comm driven in follicle cells by *traffic jam* GAL4 (*TJGAL4*) stained with DRAQ5 (magenta) and *comm* probe (grey). (C') *comm* mRNA channel from boxed region in C. (D) Ovariole with *HAFra* driven in the germline with *comm* mRNA probe (grey). (E) Percentage of ovarioles containing a degenerating egg chamber. N=161, 190, 155, 104, 85, 93 ovarioles from one trial. Scale bars are 20 microns.
